# Supplementary material for: The impact of volume expansion on thermodynamic and kinetic properties of graphite/Si alloy composite anodes
Source: Royal Society of Chemistry journal article supplement (doi:10.1039/d5ra07317k), 2025-01-01
Supplement: d5ra07317k8.pdf [file d5ra07317k8.pdf]

# **The Impact of Volume Expansion on Thermodynamic and Kinetic Properties of Graphite/Si Alloy Composite Anodes**

Min-ho Lee<sup>a</sup>, Orynassar Mukhan<sup>b</sup>, Carlos Tafara Mpupuni<sup>a</sup>, Batukhan Tatykayev<sup>b,c</sup>, Zhumabay

Bakenov<sup>c,d</sup>, and Sung Soo Kim<sup>a,\*</sup>

<sup>a</sup> *Graduate School of Energy Science and Technology, Chungnam National University, 99 Daehak-ro, Yuseong-gu, Daejeon 34134, Republic of Korea.*

<sup>b</sup> *Institute of Batteries LLC, Kabanbay batyr Ave. 53, Astana, 010000, Kazakhstan*

<sup>c</sup> *National Laboratory Astana, Nazarbayev University, Kabanbay Batyr Ave. 53, Astana, 010000, Kazakhstan*

<sup>d</sup> *Department of Chemical and Materials Engineering, School of Engineering and Digital Sciences, Nazarbayev University, Kabanbay Batyr Ave. 53, Astana, 010000, Kazakhstan*

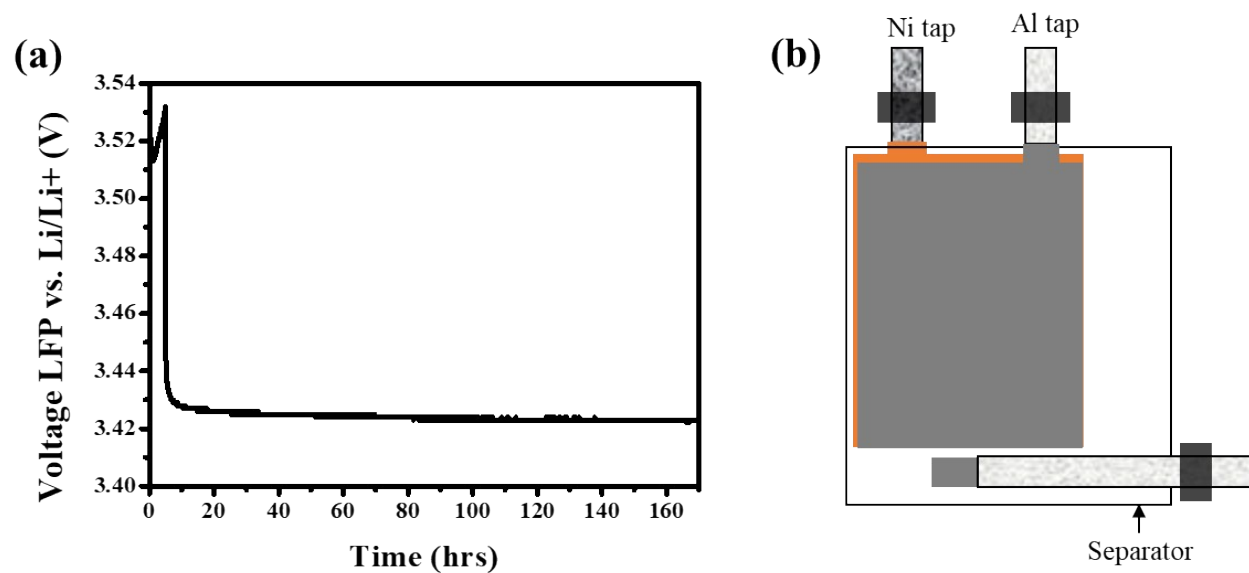

**Fig. S1** (a) Voltage profile of the LFP electrode after charging at 0.1C for 5 h, demonstrating stable performance as a reference electrode. (b) Schematic illustration of the three-electrode pouch cell.

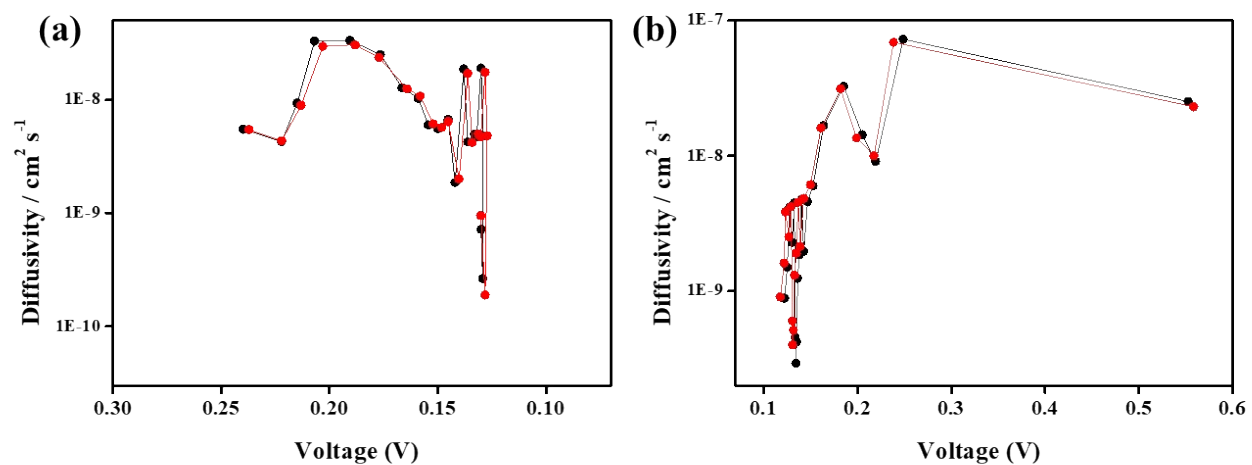

**Fig. S2** Reproducibility test of graphite electrodes under identical conditions: (a) lithiation and (b) de-lithiation processes showing consistent potential profiles and diffusivity trends (deviation within 10 %).

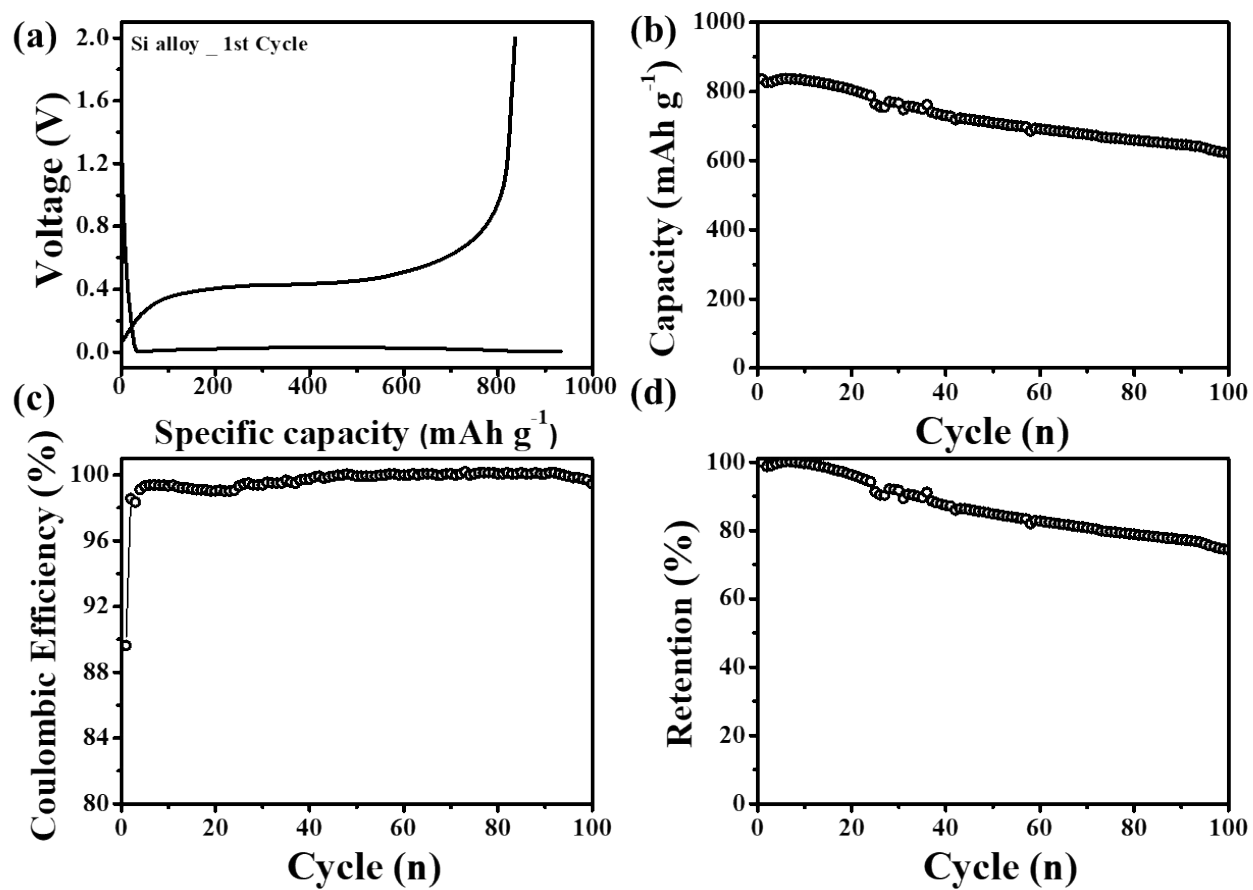

**Fig. S3** Electrochemical performance of the Si alloy anode. (a) initial voltage profile, (b) cycling performance, (c) coulombic efficiency, and (d) capacity retention.

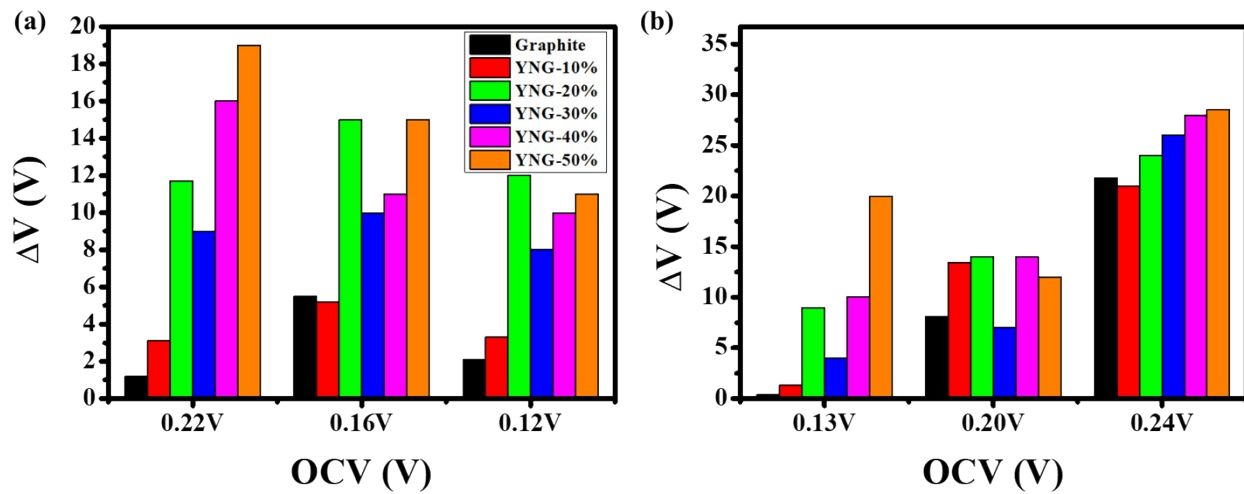

**Fig. S4**  $\Delta V$  as a function of OCV during (a) lithiation and (b) de-lithiation.

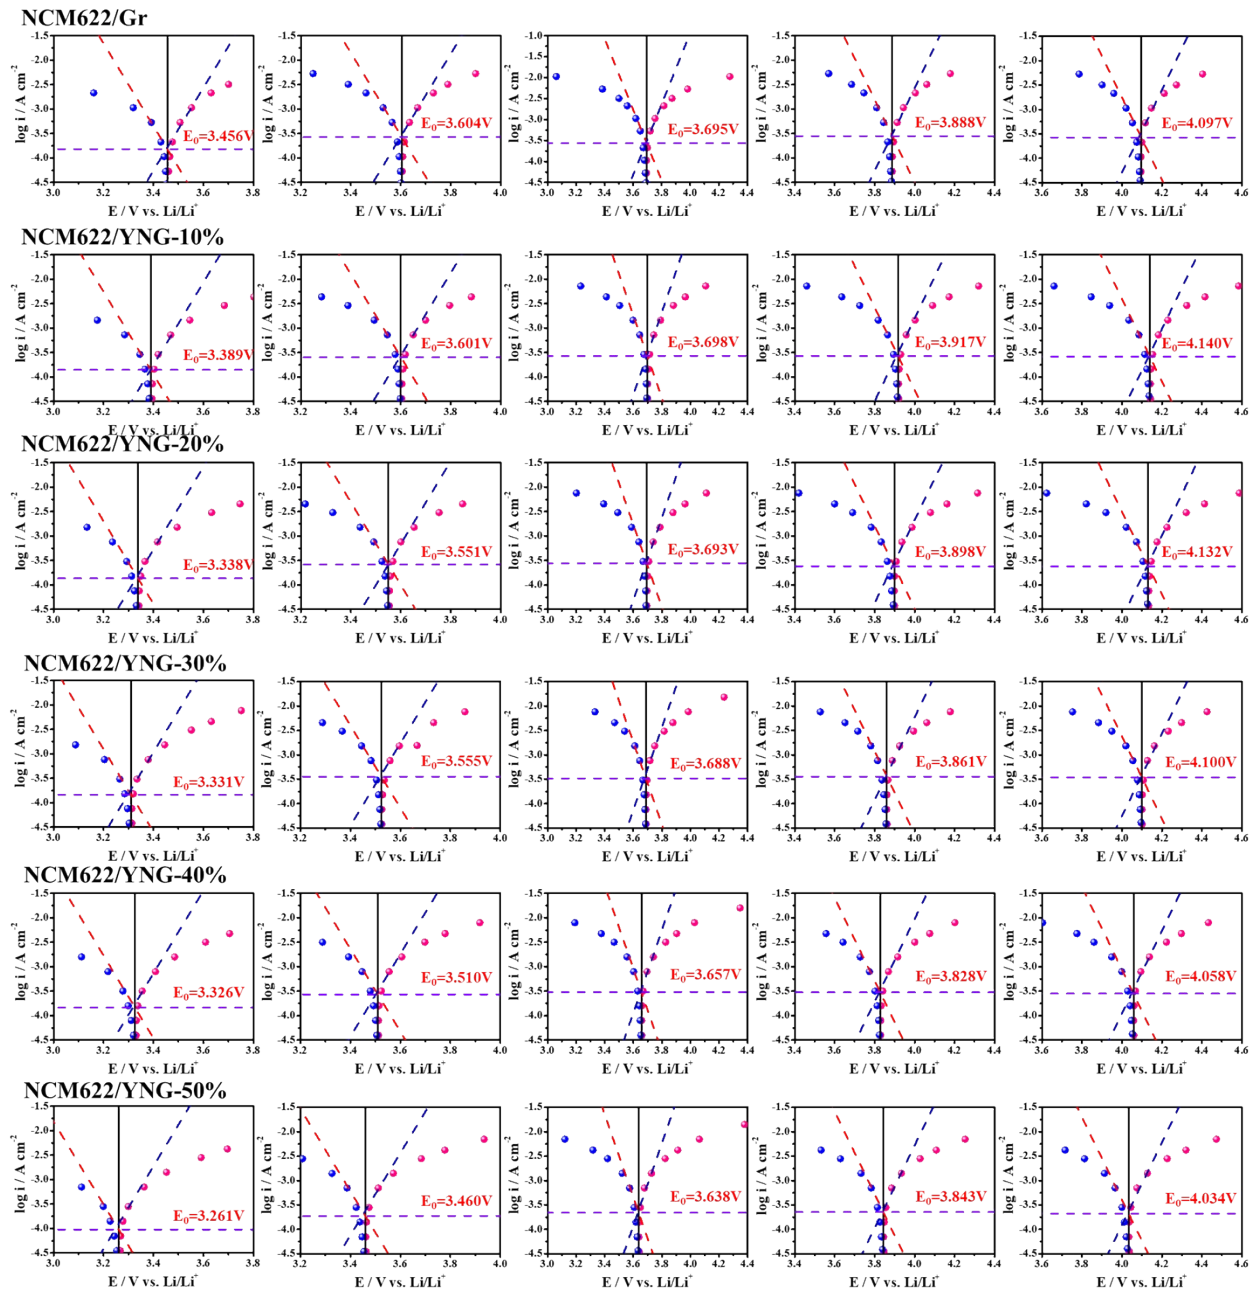

**Fig. S5** Tafel plots of the graphite/Si alloy anode at different states of charge (SOC, from left to right: 10, 30, 50, 70, and 90 %).

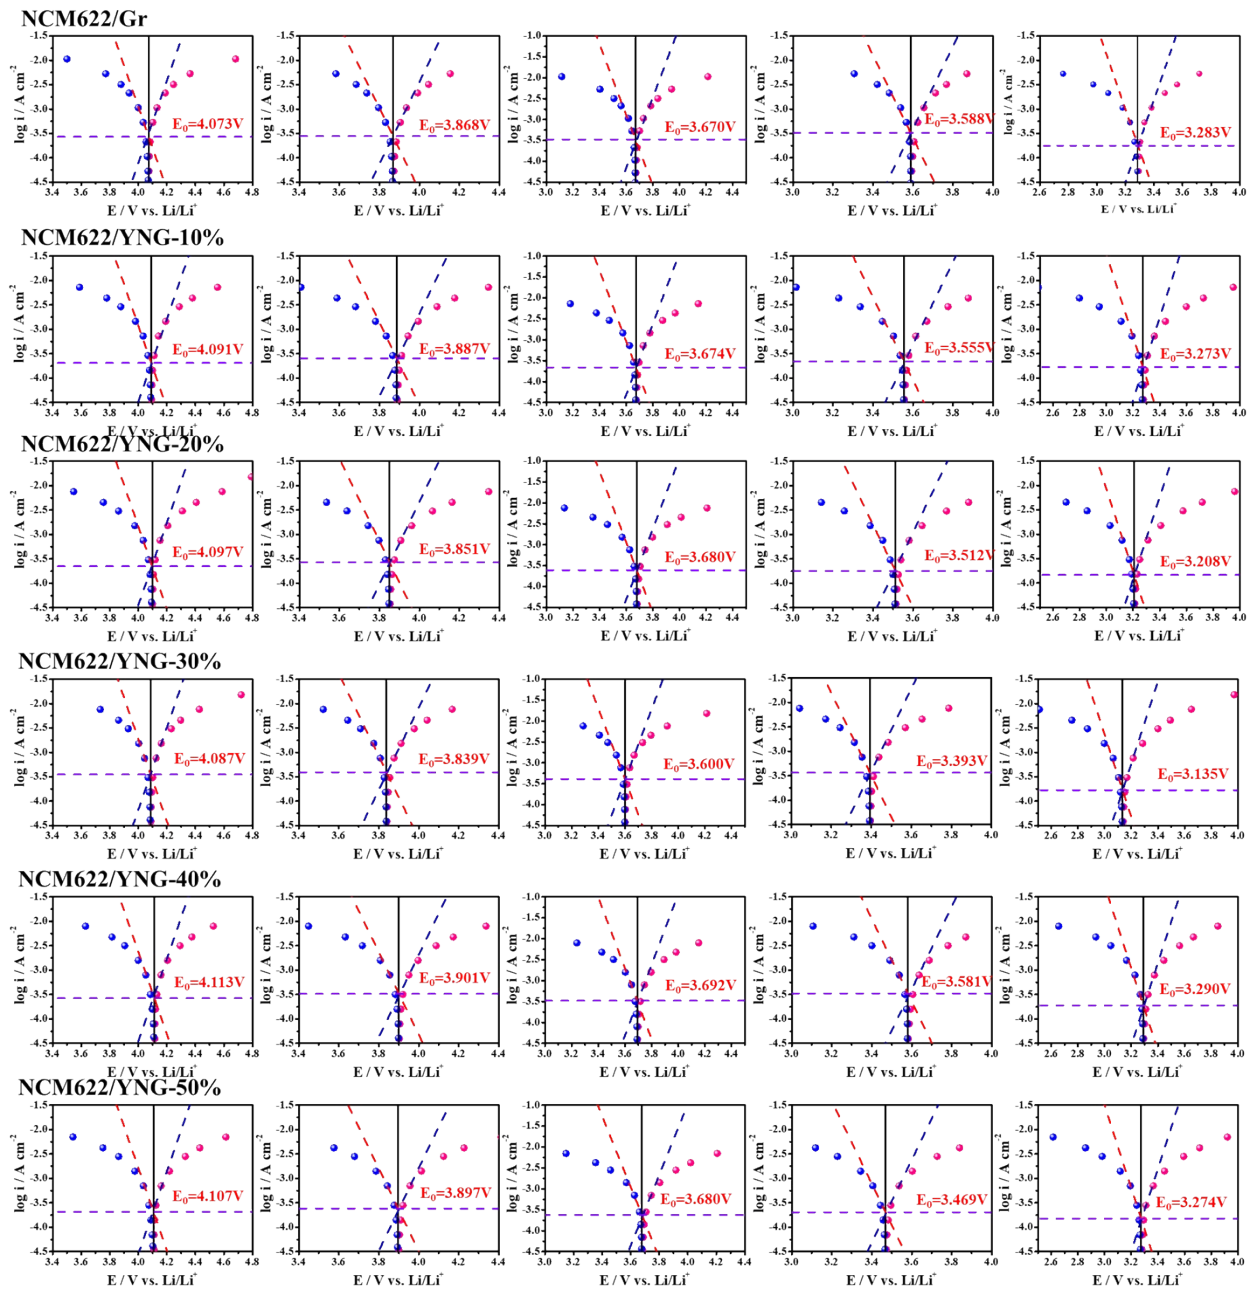

**Fig. S6** Tafel plots of the graphite/Si alloy anode at different depths of discharge (DOD, from left to right: 10, 30, 50, 70, and 90 %).

**Table. S1** Electrode properties of graphite, and graphite/Si composite anodes.

| Anode    | Graphite content (wt%) | Si alloy content (wt%) | Electrode Density (g cc <sup>-1</sup> ) | Mass loading (mg cm <sup>-2</sup> ) | Initial Thickness (μm) |
|----------|------------------------|------------------------|-----------------------------------------|-------------------------------------|------------------------|
| Graphite | 100                    | 0                      | 1.60                                    | 3.84                                | 24                     |
| YNG-10%  | 90                     | 10                     | 1.68                                    | 4.20                                | 25                     |
| YNG-20%  | 80                     | 20                     | 1.62                                    | 4.38                                | 27                     |
| YNG-30%  | 70                     | 30                     | 1.63                                    | 4.08                                | 25                     |
| YNG-40%  | 60                     | 40                     | 1.60                                    | 4.43                                | 28                     |
| YNG-50%  | 50                     | 50                     | 1.58                                    | 3.96                                | 25                     |



**Table. S2** Equivalent circuit fitting results for EIS analysis.

| Anode    | OCV (V) | $R_s$ ( $\Omega$ ) | $R_{SEI}$ ( $\Omega$ ) | $R_{ct}$ ( $\Omega$ ) |
|----------|---------|--------------------|------------------------|-----------------------|
| Graphite | 2.71    | 1.63               | 0.90                   | 12.4                  |
| YNG-10%  | 2.83    | 1.84               | 0.95                   | 4.39                  |
| YNG-20%  | 2.80    | 1.63               | 1.41                   | 1.89                  |
| YNG-30%  | 2.80    | 1.63               | 1.91                   | 0.38                  |
| YNG-40%  | 2.81    | 1.52               | 2.23                   | 1.85                  |
| YNG-50%  | 2.82    | 1.15               | 2.63                   | 0.53                  |

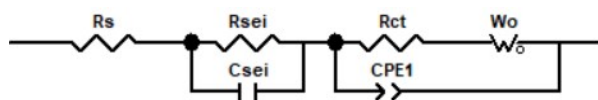

**Table. S3** Parameters used for porosity calculation.

| Parameter                                                                                           | Value |
|-----------------------------------------------------------------------------------------------------|-------|
| $\rho(\text{Graphite}) \text{ g cm}^{-3}$                                                           | 2.22  |
| $\rho(\text{Si-alloy}) \text{ g cm}^{-3}$                                                           | 3.41  |
| $\rho(\text{SWCNT}) \text{ g cm}^{-3}$                                                              | 1.3   |
| $\rho(\text{CMC}) \text{ g cm}^{-3}$                                                                | 1.59  |
| $\rho(\text{SBR}) \text{ g cm}^{-3}$                                                                | 0.94  |
| $\text{Porosity (\%)} = 1 - \frac{\text{electrode density}}{\text{theoretical density}} \times 100$ |       |
